# Supplementary material for: Anti-IL-23 therapy inhibits multiple inflammatory pathways and ameliorates autoimmune encephalomyelitis
Source: JCI journal article supplement (doi:10.1172/jci25308), 2006-05-01
Supplement: sd1 [file 1]

# Supp Fig. 1

a

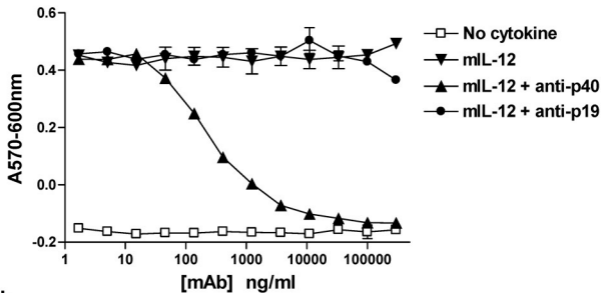

b

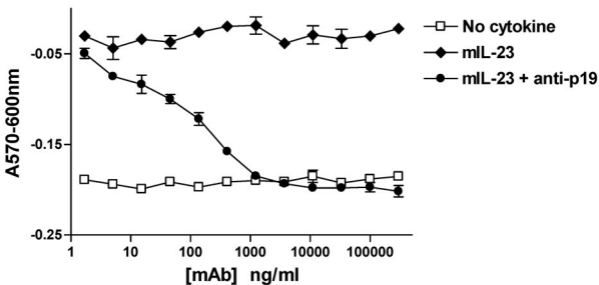

# Supp Fig. 2

**a**

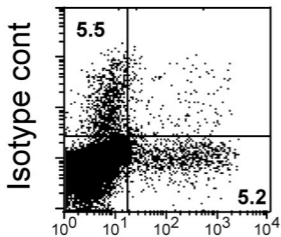

**b**

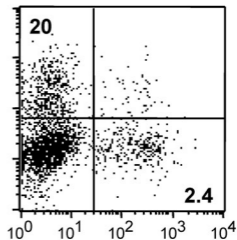

IFN- $\gamma$

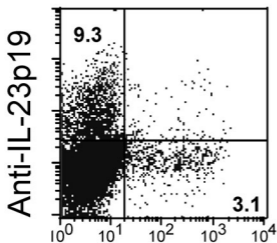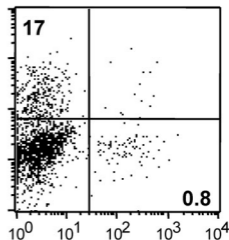

IL-17

### **Supplementary Figure 1.**

**Anti-IL-23p19 inhibits IL-23 but not IL-12 binding.** IL-23 reactive antibody was screened in a Ba/F3 transfectant bioassay (IL-12Rb1+IL-12Rb2 or IL-12Rb1+IL-23R) for the ability to block specific IL-23/IL-23R interactions (see Materials and Methods). (a) Anti-IL-12p40 (Clone c17.8) but not anti-IL-23p19 (clone MB490) inhibited IL-12 binding to IL-12R (IL-12Rb1/IL-12Rb2). (b) Anti-IL-23p19 mAb (Clone MB490) inhibited recombinant murine IL-23 binding to IL-23R (IL-12Rb1/IL-23R).

### **Supplementary Figure 2.**

**In vivo and in vitro anti-IL-23p19 treatment specifically reduced IL-17 producing cells.** (a) SJL mice were immunized with PLP<sub>139-151</sub>-CFA and treated with 1mg of isotype control (clone 27F11) or anti-IL-23p19 mAb (clone MB 490). At day 7, DLN cells were cultured with 20 µg/ml PLP peptide for 3 days. IL-17 and IFN-γ production were determined following stimulation with PMA/ionomycin for 4 hours prior to intracellular cytokine analysis. Data is representative of two experiments. (b) In vitro anti-IL-23p19 mAb treatment blocked expansion of IL-17 producing cells but not IFN-γ producing cells. DLN cells were isolated from PLP<sub>139-151</sub>-CFA primed mice and stimulated with PLP peptide for 3 days in the presence of isotype control or anti-IL-23p19 mAb. IFN-γ production were determined following stimulation with PMA/ionomycin for 4 hours prior to intracellular cytokine analysis. Data is representative of at least three experiments.
